# Supplementary material
Source: MDPI journal article supplement (https://www.mdpi.com/2076-3417/12/10/5200)
Supplement: s1 [file s1]

## Article

# Supplementary Materials: The Mortars of Florence Riverbanks: Raw Materials and Technologies of *Lungarni* Historical Masonry

Sara Calandra, Teresa Salvatici, Irene Centauro, Emma Cantisani and Carlo Alberto Garzonio

**Table S1.** Mineralogical composition (semiquantitative data) of mortars and selected lumps (L).

| Sample   | Sampling depth (m) | Quartz | Calcite | Plagioclase | K feldspar | Other                                                    |
|----------|--------------------|--------|---------|-------------|------------|----------------------------------------------------------|
| C2-X     | 0.80               | +++    | +       | +           | -          | Muscovite (*), chlorite (*)                              |
| C2b-Y    | 2.50               | +++    | +       | +           | -          | Muscovite (*), vermiculite (*), clinochlore (*)          |
| C3-X     | 1.30               | +++    | +       | +           | -          | Muscovite (*), chlorite (*)                              |
| C5-Z     | 0.50               | +++    | +       | +           | -          | Muscovite (*), gypsum (+)                                |
| C5-W     | 1.06               | +++    | +       | +           | +          | Muscovite (*), gypsum (+), ettringite (*)                |
| C6-Y     | 0.63               | +++    | +       | +           | -          | Muscovite (*), clinochlore (*)                           |
| C7-X     | 0.58               | ++     | +++     | +           | -          | Muscovite (*), clinochlore (*), vaterite (+)             |
| C7-Y     | 1.16               | +++    | +       | +           | -          | Muscovite (*), clinochlore (*)                           |
| C10-X    | 0.32               | +++    | ++      | +           | -          | Muscovite (*), clinochlore (*)                           |
| C10-Y    | 0.53               | ++     | +       | +++         | *          | Muscovite (*), clinochlore (*), montmorillonite (*)      |
| C10-Y    | 1.00               | +++    | ++      | +           | +          | Muscovite (*), clinochlore (*), montmorillonite (*)      |
| C11- X   | 0.67               | +++    | +       | +           | -          | Muscovite (+), clinochlore (*), tobermorite (*)          |
| C13- X   | 0.30               | +++    | +       | +           | -          | Muscovite (*), clinochlore (*), tobermorite (*)          |
| C2-X L   |                    | -      | +++     | -           | -          | Vaterite (++) , tobermorite (++) , gypsum (*)            |
| C2b-Y L1 |                    | -      | +++     | -           | -          | Aragonite (+), vaterite (+), gypsum (++)                 |
| C2b-Y L2 |                    | -      | ++      | -           | -          | Vaterite (+++), tobermorite (+), gypsum (+)              |
| C3-X L   |                    | +      | +++     | -           | -          | Tobermorite (*), gypsum (*)                              |
| C6-Y L   |                    | *      | +++     | -           | -          | Tobermorite (+), gypsum (*)                              |
| C7-X L   |                    | +      | +++     | -           | -          | Tobermorite (*)                                          |
| C13-X L  |                    |        | +++     |             |            | Aragonite (+), vaterite (+), tobermorite (+), gypsum (*) |

(+++ : very abundant; ++ : abundant; + : present; \* : traces; - : below detection limit)

**Table S2.** Petrographic description of core samples.

| Mortar samples | Binder                                                                                                                | Aggregate                                                                                                                                                                                                                                                                                | B/A     | Macroporosity                                                       |
|----------------|-----------------------------------------------------------------------------------------------------------------------|------------------------------------------------------------------------------------------------------------------------------------------------------------------------------------------------------------------------------------------------------------------------------------------|---------|---------------------------------------------------------------------|
| C2-X           | Heterogeneous structure and micritic/ microsparitic texture. Some areas with low birefringence colour. Numerous lumps | Composition: quartz (mono and polycrystalline) plagioclases, few carbonate rock fragments, siltstones<br>Heterogeneous grain size distribution<br>Grain size: 300 $\mu$ m-2-3mm<br>Shape: sub angular                                                                                    | 1/3-1/4 | Medium/high amount due to pores of irregular shape                  |
| C2b-Y          | Heterogeneous structure and micritic/microsparitic texture. Some area with low birefringence colour. Numerous lumps   | Composition: quartz (mono and polycrystalline) plagioclases, K feldspar, calcite, arenaceous and carbonate rock fragments, siltstones<br>Heterogeneous grain size distribution<br>Grain size 500 $\mu$ m-3 mm<br>Shape: sub angular/ sub rounded                                         | 1/4     | Medium/high amount due to microcracks and pores of irregular shape  |
| C3-X           | Heterogeneous structure and micritic/microsparitic texture. Numerous lumps                                            | Composition: quartz (mono and polycrystalline) plagioclases, K feldspar, calcite, arenaceous rock fragments, siltstones, marly limestone fragments<br>Homogeneous grain size distribution<br>Mean grain size 150-200 $\mu$ m, few mm grains<br>Shape: sub angular/ sub rounded           | 1/3     | Medium /high amount due to microcracks and pores of irregular shape |
| C5-Z           | Heterogeneous structure and micritic texture. Remains of unhydrated clinker                                           | Composition: quartz (mono and polycrystalline) plagioclases, K feldspar, arenaceous and carbonate rock fragments, siltstones, magmatic and metamorphic rock fragments<br>Bimodal grain size distribution<br>Grain size: 1-2 mm; 500-800 $\mu$ m<br>Shape: sub angular/ sub rounded       | 1/3     | Low amount due to microcracks and pores of irregular shape          |
| C5-W           | Heterogeneous structure and micritic/microsparitic texture. Remains of unhydrated clinker                             | Composition: quartz (mono and polycrystalline) plagioclases, K feldspar, arenaceous and carbonate rock fragments, siltstones, magmatic and metamorphic rock fragments<br>Heterogeneous grain size distribution<br>Grain size: 1-2 mm; 100-800 $\mu$ m<br>Shape: sub angular/ sub rounded |         | Low amount due to pores of sub rounded shape                        |
| C6-Y           | Heterogeneous structure and micritic/microsparitic texture.                                                           | Composition: quartz (mono and polycrystalline) plagioclases, calcite, K feldspar,                                                                                                                                                                                                        | 1/4     | Medium/high amount due to pores of sub rounded shape                |

|       |                                                                                                          |                                                                                                                                                                                                                                 |     |                                                     |
|-------|----------------------------------------------------------------------------------------------------------|---------------------------------------------------------------------------------------------------------------------------------------------------------------------------------------------------------------------------------|-----|-----------------------------------------------------|
|       | Some area with low birefringence colour.                                                                 | arenaceous and carbonate rock fragments, few magmatic rock fragments.<br>Heterogeneous grain size distribution<br>Grain size 100 $\mu$ m-1.5mm<br>Shape: sub angular/ sub rounded                                               |     |                                                     |
| C7-X  | Heterogeneous structure and micritic/microsparitic texture.<br>Numerous lumps                            | Composition: quartz (mono and polycrystalline) plagioclases, K feldspar, arenaceous and carbonate rock fragments<br>Heterogeneous grain size distribution<br>Grain size: 1-2 mm; 300 $\mu$ m<br>Shape: sub angular/ sub rounded | 1/3 | Medium amount due to pores of irregular shape       |
| C7-Y  | Heterogeneous structure and micritic/microsparitic texture.<br>Some area with low birefringence colour.  | Composition: quartz (mono and polycrystalline) plagioclases, K feldspar, carbonate rock fragments.<br>Homogeneous grain size distribution<br>Grain size 800- 100 $\mu$ m<br>Shape: sub angular/ sub rounded                     | 1/3 | Medium amount due to pores of irregular shape       |
| C10-X | Heterogeneous structure and micritic/microsparitic texture.                                              | Composition: quartz (mono and polycrystalline) plagioclases, K feldspar, few rock fragments.<br>Homogeneous grain size distribution<br>Grain size 700- 100 $\mu$ m<br>Shape: sub angular/ sub rounded                           | 1/4 | Medium /high amount due to pores of irregular shape |
| C10-Y | Heterogeneous structure and micritic/microsparitic texture.<br>Some areas with low birefringence colour. | Composition: quartz (mono and polycrystalline) plagioclases, K feldspar, fragments of carbonate rocks, sandstones<br>Heterogeneous grain size distribution<br>Grain size 2 mm- 400 $\mu$ m<br>Shape: sub angular/ sub rounded   | 1/4 | High amount due to pores of irregular shape         |
| C10-Y | Heterogeneous structure and micritic/microsparitic texture.<br>Some areas with low birefringence colour. | Composition: quartz (mono and polycrystalline) plagioclases, K feldspar, few fragments of rocks<br>Homogeneous grain size distribution<br>Grain size 600- 100 $\mu$ m<br>Shape: sub angular/ sub rounded                        | 1/4 | High amount due to pores of irregular shape         |

---

|        |                                                                                                                   |                                                                                                                                                                                                             |                                               |
|--------|-------------------------------------------------------------------------------------------------------------------|-------------------------------------------------------------------------------------------------------------------------------------------------------------------------------------------------------------|-----------------------------------------------|
| C11- X | Heterogeneous structure and micritic/microsparitic texture. Some areas with low birefringence colour. Some lumps. | Composition: quartz (mono and 1/4 polycrystalline) plagioclases, K feldspar, few fragments of rocks<br>Homogeneous grain size distribution<br>Grain size 400- 50 $\mu$ m<br>Shape: sub angular/ sub rounded | Medium amount due to pores of irregular shape |
|--------|-------------------------------------------------------------------------------------------------------------------|-------------------------------------------------------------------------------------------------------------------------------------------------------------------------------------------------------------|-----------------------------------------------|

---

|        |                                                                                                                   |                                                                                                                                                                                            |                                                     |
|--------|-------------------------------------------------------------------------------------------------------------------|--------------------------------------------------------------------------------------------------------------------------------------------------------------------------------------------|-----------------------------------------------------|
| C13- X | Heterogeneous structure and micritic/microsparitic texture. Some areas with low birefringence colour. Some lumps. | Composition: quartz (mono and 1/4 polycrystalline) plagioclases, K feldspar, few fragments of rocks<br>Homogeneous grain size distribution<br>Grain size 200 $\mu$ m<br>Shape: sub angular | Medium/ high amount due to pores of irregular shape |
|--------|-------------------------------------------------------------------------------------------------------------------|--------------------------------------------------------------------------------------------------------------------------------------------------------------------------------------------|-----------------------------------------------------|

---

(B/A= binder/aggregate ratio)
